# Supplementary figures and images for: Directional Bloch surface wave coupling enabled by magnetic spin-momentum locking of light
Source: Royal Society of Chemistry journal article supplement (doi:10.1039/d2na00899h), 2023-01-01

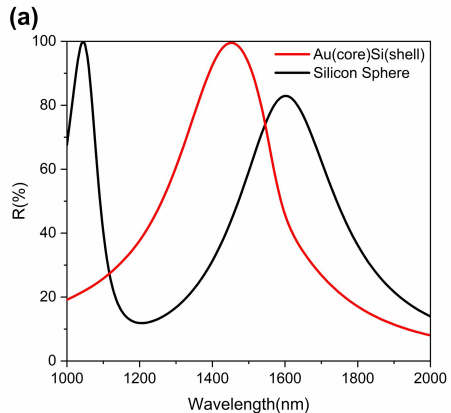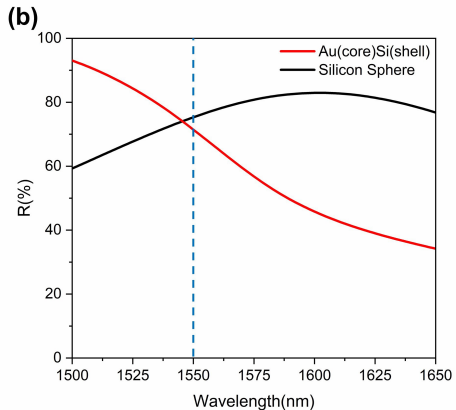

Supplement: d2na00899h3.pdf [file d2na00899h3.pdf]

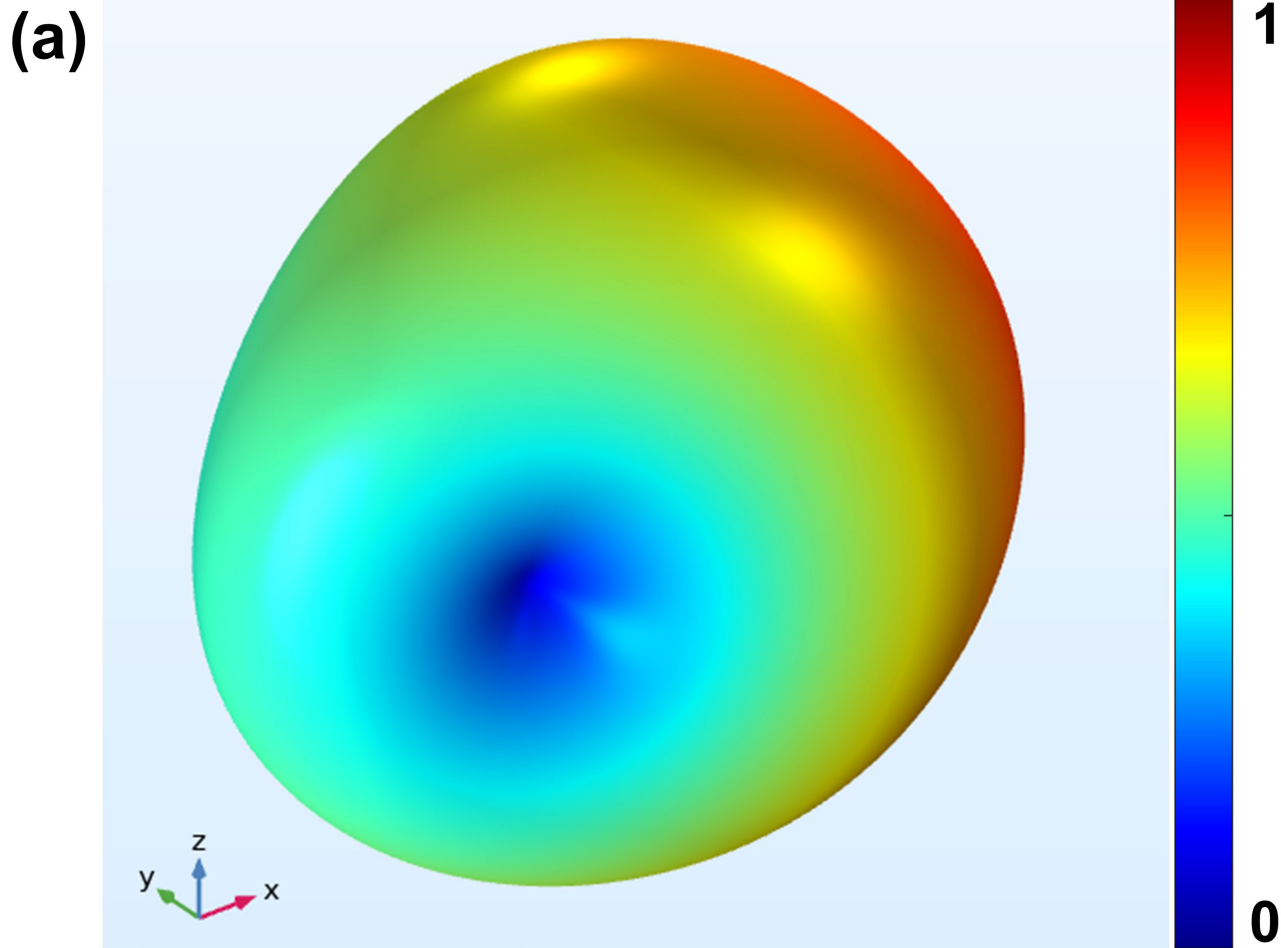

Supplement: d2na00899h4.pdf [file d2na00899h4.pdf]

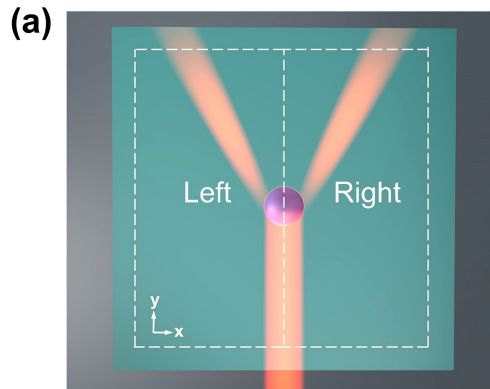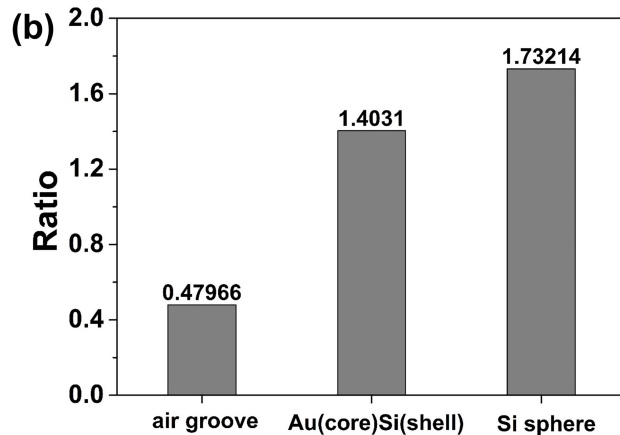

Supplement: d2na00899h6.pdf [file d2na00899h6.pdf]
